# Supplementary material for: Characterization of milk oligosaccharide and sialic acid content and their influence on brain sialic acid in a lean mouse model for gestational diabetes
Source: PubMed Central journal article supplement (PMC10839809; doi:10.1016/j.heliyon.2024.e24539), 2024-01-24
Supplement: mmc2.pdf [file mmc2.pdf]

**S-Figure 1.**

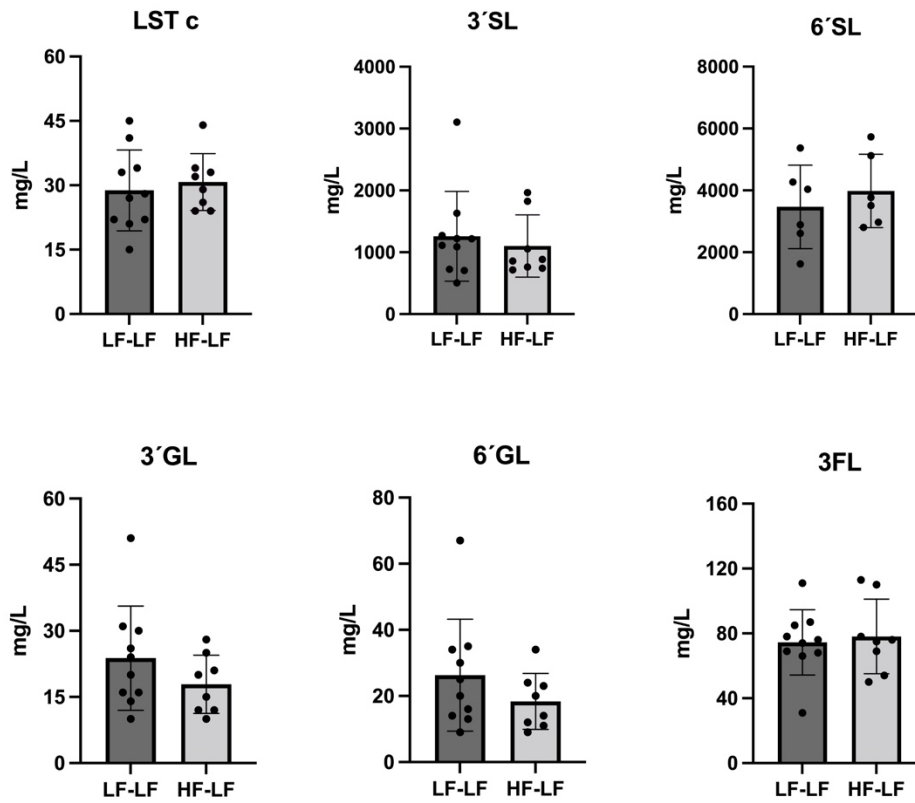

**S-Figure 1.** The concentration of oligosaccharides in LF-LF and HF-LF. Unpaired t test was used. \* $p < 0.05$ , \*\* $p < 0.01$ , \*\*\* $p < 0.001$ , \*\*\*\* $p < 0.0001$ .

## S-Figure 2.

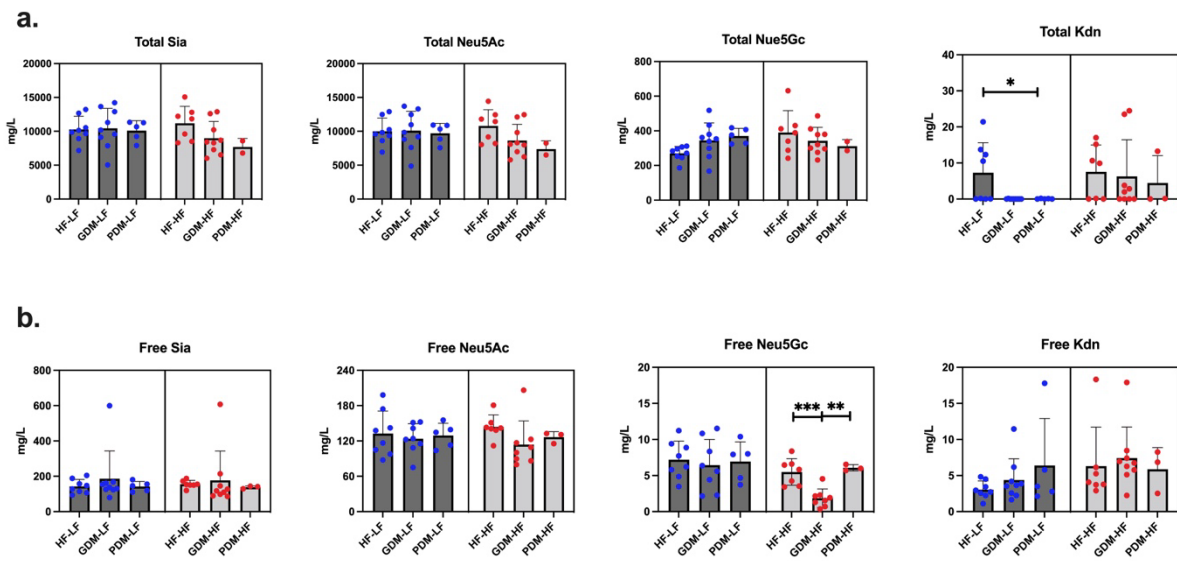

**S-Figure 2.** (a) The concentration of total milk Sia (Neu5Ac, Neu5Gc, Kdn) in LF (HF-LF, GDM-LF, PDM-LF) and HF (HF-HF, GDM-HF, PDM-HF) groups. (b) The concentration of free milk Sia (Neu5Ac, Neu5Gc, Kdn) in LF (HF-LF, GDM-LF, PDM-LF) and HF (HF-HF, GDM-HF, PDM-HF) groups. Blue points = low fat diet during lactation, red points = high fat diet during lactation. One-Way ANOVA followed by Tukey's multiple comparison test (Total Sia, Neu5Ac, Neu5Gc) or Kruskal Wallis followed by Dunn's multiple comparison test (Free Sia, Neu5Ac, Neu5Gc, Kdn, total Kdn) were used. \* $p < 0.05$ , \*\* $p < 0.01$ , \*\*\* $p < 0.001$ .

**S-Figure 3**

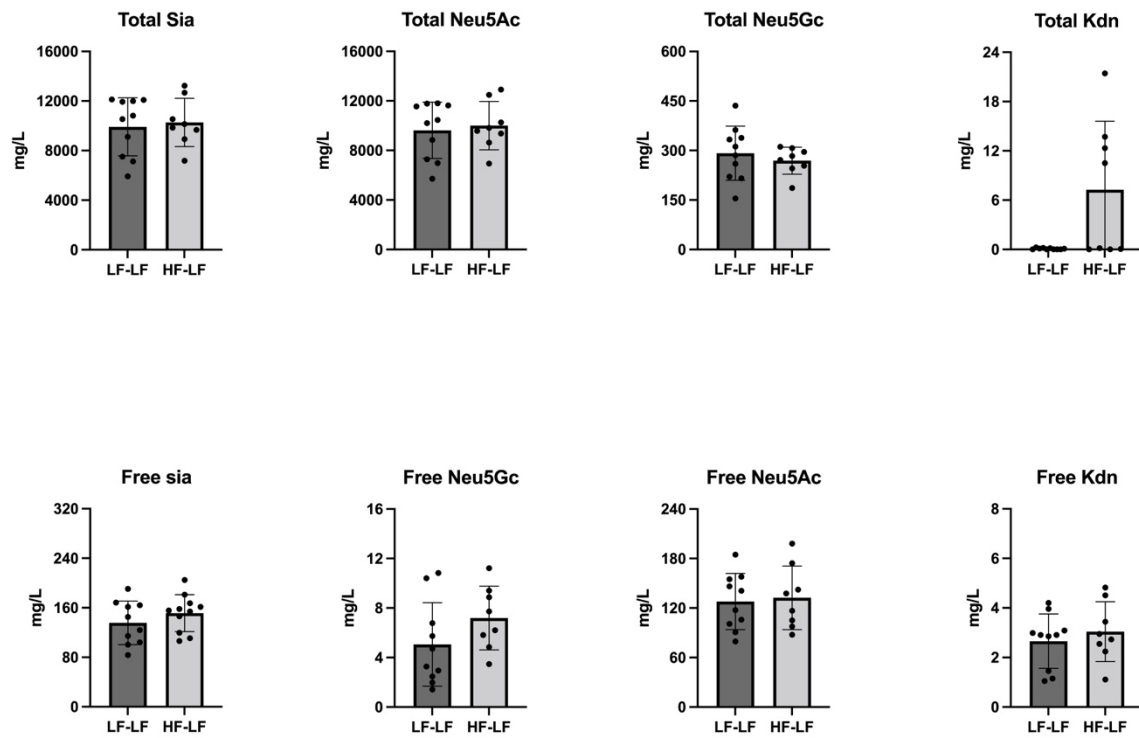

**S-Figure 3.** The concentration of total and free Sia (Neu5Ac, Neu5Gc, Kdn) in mouse milk between LF-LF and HF-LF groups. Unpaired t test (Total Sia, Neu5Ac, Neu5Gc) or Mann-Whitney test (Free Sia, Neu5Ac, Neu5Gc, Kdn, total Kdn) were used. \* $p < 0.05$ , \*\* $p < 0.01$ , \*\*\* $p < 0.001$ , \*\*\*\* $p < 0.0001$ .

## S-Figure 4

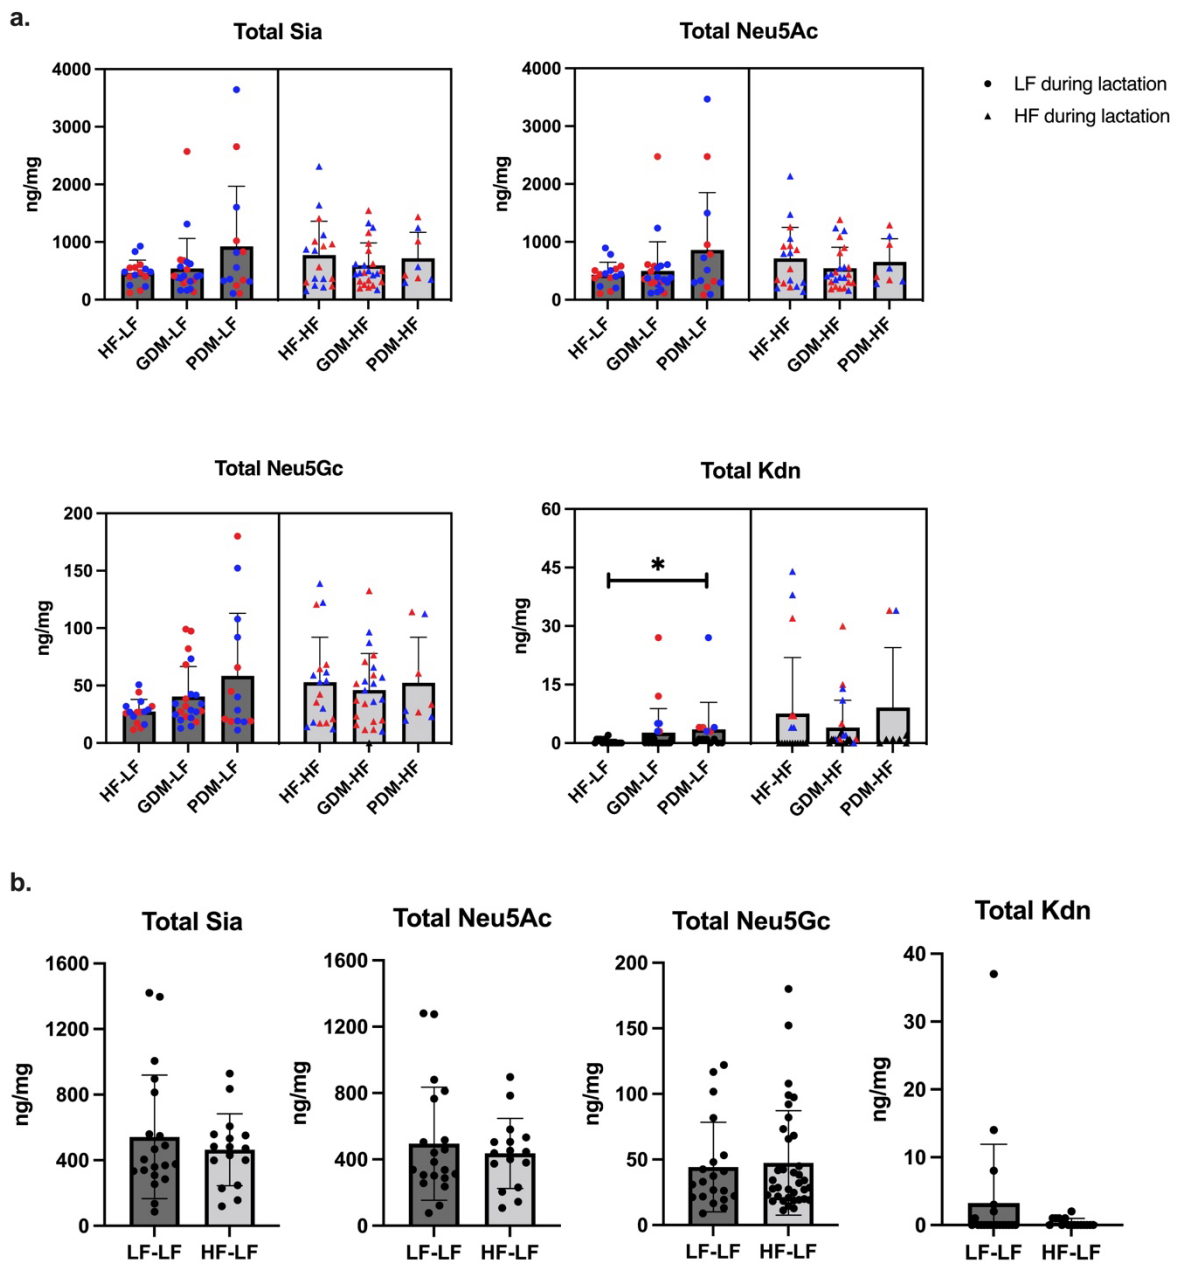

**S-Figure 4.** (a) The concentration of total brain Sia (Neu5Ac, Neu5Gc, Kdn) in LF (HF-LF, GDM-LF, PDM-LF) and HF (HF-HF, GDM-HF, PDM-HF) groups. (b) The concentration of total brain Sia in LF-LF and HF-LF groups. Blue points = male pups, red points = female pups. Round shape = low-fat diet during the lactation, triangle shape = high-fat diet during the lactation. Kruskal Wallis followed by Dunn's multiple comparison test were used (a), Mann-Whitney test was used (b). \* $p < 0.05$ , \*\* $p < 0.01$ , \*\*\* $p < 0.001$ , \*\*\*\* $p < 0.0001$ .
